# Supplementary material for: The Critical Role of the miR-285–SCP-2 Regulatory Axis in Reproductive Homeostasis of the Hard Tick Haemaphysalis. longicornis
Source: Research Square preprint supplement (doi:10.21203/rs.3.rs-8551275/v1), 2026-01-20
Supplement: Supplementary file 1 [file d0e26d14fee13e0fb006bfde.docx]

Table 1 The Primers and miR-285 sequence used in this study.

| Purpose | Primer name | Primer sequence (5′–3′) |
| --- | --- | --- |
| Amplify the complete open reading frame of SCP-2 | SCP-2-F（c） | ATGGCAGCGGAGCGCACC |
| SCP-2-R（c） | TCAGAGGGCGGCCCTGG |
| Real-time PCR analysis | SL primer（q） | CTCAACTGGTGTCGTGGAGTCGGCAATTCAGTTGAC |
| miR-285 F（q） | TAGCACCATTTGAATT |
| miR-285 R（q） | CTCAACTGGTGTCGTGGAGTC |
| β-actin F（q） | CGTTCCTGGGTATGGAATCG |
| β-actin R（q） | TCCACGTCGCACTTCATGAT |
| SCP-2 F（q） | CTAGGAATGACGGGCATCCC |
| SCP-2 R（q） | GTCGCGGTACTTGGATGTGA |
| Amplify the 3′ UTR of SCP-2 | SCP-2-F（d） | TGTAATTCTAGTTGTTTAAACCTCGACGGCGCTGCT |
| SCP-2-R（d） | CCTGCAGGTCGACTCTAGACTGTTGAGCTGCCTTGC |
| miR-285 sequence | | TAGCACCATTTGAATTCAGTTC |

SL means Stem loop；Restriction sites are underlined.

Table 2 Analysis of risk factors for *Toxoplasma gondii* infection in pigs in Xinjiang Uygur Autonomous Region, China

| Factor | Category | No. tested | Prevalence (%) | OR (95%CI) | *P*-value |
| --- | --- | --- | --- | --- | --- |
| Region | Northern Xinjiang | 285 | 11.2 | 1.36（0.69-2.68） | >0.05 |
| Eastern Xinjiang | 153 | 8.5 | Reference |  |
| Southern Xinjiang | 262 | 12.2 | 1.44（0.73-2.83） | >0.05 |
| Presence of free-roaming cat | **Yes** | **388** | **15.5** | **1.81（1.10-3.0）** | **<0.05** |
| No | 262 | 9.2 | Reference |  |
| Presence of rodents | Yes | 306 | 8.2 | 0.86（0.51-1.46） | >0.05 |
| No | 394 | 9.4 | Reference |  |
| Age | 0<year<1 | 155 | 6.3 | Reference |  |
| 1<year<2 | 306 | 10.2 | 1.64（0.78-3.43） | >0.05 |
| **2<year<3** | **239** | **15.2** | **2.58（1.24-5.35）** | **<0.05** |

Bold values indicate statistical significance at the *P* < 0.05 level

Table 3 Genotyping of Toxoplasma gondii isolates in sheep and pigs in Xinjiang Uygur Autonomous Region, China

| Isolate ID | SAGI | 5′ + 3′ SAG2 | Alternative SAG2 | SAG3 | BTUB | GRA6 | c22–8 | c29–2 | L358 | PK1 | Apico | Genotype |
| --- | --- | --- | --- | --- | --- | --- | --- | --- | --- | --- | --- | --- |
| GT1 | I | I | I | I | I | I | I | I | I | I | I | Reference, Type I,ToxoDB#10 |
| PTG | II/III | II | II | II | II | II | II | II | II | II | II | Reference, Type II, ToxoDB#1 |
| CTG | II/III | III | III | III | III | III | III | III | III | III | III | Reference, Type III, ToxoDB#2 |
| MAS | u-1 | I | II | III | III | III | u-1 | I | I | I | I | Reference, ToxoDB#17 |
| TgCgCa1 | I | II | II | III | II | II | II | u-1 | I | u-2 | I | Reference, ToxoDB#66 |
| TgCatBr5 | I | III | III | III | III | III | I | I | I | u-1 | I | Reference, ToxoDB#19 |
| TgCatBr64 | I | I | u-1 | III | III | III | u-1 | I | III | III | I | Reference, ToxoDB#111 |
| TgRsCr1 | u-1 | I | II | III | I | III | u-2 | I | I | I | I | Reference, ToxoDB#52 |
| 4（sheep） | I | I | I | I | I | I | I | I | I | I | I | ToxoDB#10 |
| 15（sheep） | u-1 | II | II | III | III | II | II | III | II | II | I | ToxoDB#9 |
| 101（sheep） | N | I | I | I | I | I | I | N | N | I | N | Type I 或 ToxoDB#27 或 ToxoDB#35 |
| 159（sheep） | I | I | I | I | I | I | I | I | I | I | I | ToxoDB#10 |
| 244（sheep） | u-1 | II | II | III | III | II | II | III | II | II | I | ToxoDB#9 |
| 385（sheep） | u-1 | II | II | III | N | N | N | N | II | N | N | ToxoDB#9 或 ToxoDB#20 |
| 16（pig） | I | I | I | I | I | I | I | I | I | I | I | ToxoDB#10 |
| 59（pig） | N | I | I | I | N | N | I | N | I | N | N | Type I 或 ToxoDB#24 |
| 78（pig） | I | I | I | I | I | I | I | I | I | I | I | ToxoDB#10 |
| 93（pig） | u-1 | II | II | III | N | N | N | N | II | N | N | ToxoDB#9 或 ToxoDB#20 |
| 131（pig） | I | I | I | I | I | I | I | I | I | I | I | ToxoDB#10 |
| 231（pig） | N | I | I | I | N | N | I | N | I | N | N | Type I 或 ToxoDB#24 |
| 229（pig） | u-1 | II | II | III | III | II | II | III | II | II | I | ToxoDB#9 |
| 254（pig） | I | I | I | I | I | I | I | I | I | I | I | ToxoDB#10 |
